# Supplementary material
Source: Springer Nature journal article supplement (https://www.springermedizin.de/resource/supplementary/12885_2010_2878_MOESM2_ESM.pdf/9462192)

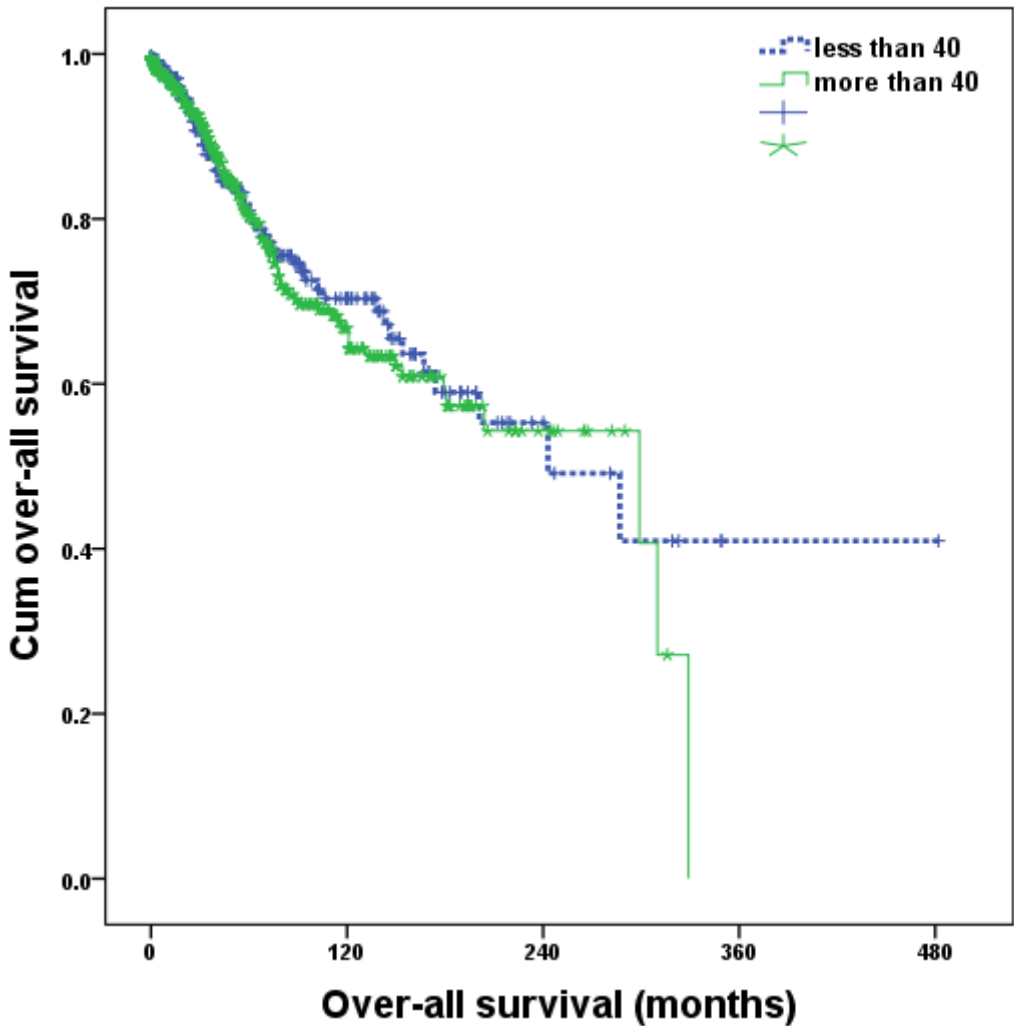

**Log-rank**

*P Value* = 0.578

$\chi^2 = 0.310$ , *df* = 1

**At Risk:**

|          |         |          |          |           |   |
|----------|---------|----------|----------|-----------|---|
| < 40 yrs | 272 (0) | 226 (46) | 219 (53) | 217 (55)  | - |
| > 40 yrs | 540 (0) | 450 (90) | 441 (99) | 438 (102) | - |

Supplement: MOESM2 [file 9462192]
